# Supplementary material for: PTEN deficiency promotes pathological vascular remodeling of human coronary arteries
Source: PubMed Central journal article supplement (PMC5916252; doi:10.1172/jci.insight.97228), 2018-02-22
Supplement: jciinsight-3-97228-s001.pdf [file jciinsight-3-97228-s001.pdf]

Supplemental Table 1: Primer Sequences for qPCR

| Gene Name     | Forward Primer       | Reverse Primer       |
|---------------|----------------------|----------------------|
| <i>Fbln1</i>  | GACTGCTCGCTCTCCTACAC | GCTCCTCCAGTTGGTTGTGA |
| <i>Col6a3</i> | GCCTGATTGGGGAACAAGGA | ATTTCCAGTGCCTCCCTTCG |
| <i>Vcan</i>   | GATCATCTGGACGGCGATGT | GTTTGCACACTCTGCTTCGG |
| <i>Col4a2</i> | GGGAGAGGCTGGATTCTTCG | TCATCCCCGGCAGGATTAGA |
| <i>Col4a1</i> | CTCTGTTGGTCCCCCGC    | CCAGAGCCACCACAATCACC |
| <i>Il15</i>   | AGAGTTGGACGAAGAGGGGA | TGCTTTGAAGAGCCAGAGGG |
| <i>Il6</i>    | CACTTCACAAGTCGGAGGCT | TCTGACAGTGCATCATCGCT |
| <i>Ccl2</i>   | TGGGCCTGTTGTTACAGTT  | GAGTAGCAGCAGGTGAGTGG |
| <i>Cxcl13</i> | CACCTCCAGGCAGAATGAGG | TCGAGCTCACCTTGGAACAC |
| <i>Tgfa</i>   | CTCTGCTAGCGCTGGGTATC | TGTGGGAATCTGGGCACTTG |
| <i>Cx3cl1</i> | CCAATCCCAGTGACCTTGCT | CTCGTCTCCAGGATGATGGC |
| <i>Fbln2</i>  | AGCTTTGCCAGCATCTTTGC | GACTCTCGTGCAGTGTCCAA |
| <i>Matn2</i>  | GACTGCACTGCTGGAGAGTT | GACACTTCGGGAGCTGTCAA |
| <i>Fbln5</i>  | CCACGATTTCCAGGCCTCTT | TCGTCCACATCCACACACTG |
| <i>Eln</i>    | GACTTCTGGGAGCGTTTGGA | CCACCTGGCCTTGAAGCATA |

**Supplemental Table 2: Non-atherosclerotic Hyperplasia Coronary Artery Samples**

| Identifier | Vessel | Age | Sex | Pathology                  | PTEN | $\alpha$ SMA | Movat's | PSR | SHG |
|------------|--------|-----|-----|----------------------------|------|--------------|---------|-----|-----|
| A0998      | LAD    | 63  | M   | Familial cardiomyopathy    | Y    | Y            | N       | N   | N   |
| A1004      | LAD1   | 64  | F   | Ischemic cardiomyopathy    | Y    | Y            | N       | N   | Y   |
|            | LAD2   |     |     |                            | Y    | Y            | Y       | Y   | N   |
|            | RCA2   |     |     |                            | Y    | Y            | Y       | Y   | Y   |
| A1007      | RCA2   | 24  | M   | Non-ischemic CM            | Y    | Y            | N       | N   | N   |
|            | LAD    |     |     |                            | Y    | Y            | Y       | Y   | N   |
|            | LCX    |     |     |                            | Y    | Y            | Y       | Y   | Y   |
|            | RCA3   |     |     |                            | N    | N            | Y       | N   | N   |
|            | LAD2   |     |     |                            | N    | N            | Y       | Y   | Y   |
|            | RCA1   |     |     |                            | N    | N            | Y       | Y   | Y   |
| A1010      | LCX    | 45  | M   | Familial CM V-tach         | Y    | Y            | Y       | Y   | Y   |
|            | RCA3   |     |     |                            | N    | N            | N       | N   | N   |
|            | RCA2   |     |     |                            | N    | N            | Y       | N   | N   |
| A1016      | LAD    | 51  | F   | ASD congenital HD          | Y    | Y            | N       | N   | N   |
|            | LCX    |     |     |                            | Y    | Y            | Y       | N   | N   |
| A1024      | Lmain  | 58  | F   | Non-failing donor          | Y    | Y            | Y       | Y   | N   |
| A1035      | LAD    | 47  | M   | Hypertrophic CM            | Y    | Y            | Y       | Y   | Y   |
|            | mRCA   |     |     |                            | Y    | Y            | Y       | Y   | Y   |
| A0997      | mLCX   | 45  | M   | Non-ischemic CM            | N    | N            | Y       | Y   | Y   |
| A1001      | RCA2   | 28  | F   | Congenital Epstein anomaly | N    | N            | Y       | Y   | Y   |
| A1043      | LAD    | 65  | M   | Non-ischemic CM            | N    | N            | Y       | N   | N   |
| A0937      | LCA    | 43  | M   | Non-failing donor          | N    | N            | Y       | Y   | N   |
| A1044      | mRCA   | 52  | F   | Non-failing donor          | N    | N            | Y       | Y   | N   |
|            | pRCA   |     |     |                            | N    | N            | Y       | N   | N   |
|            | LCX    |     |     |                            | N    | N            | N       | Y   | N   |
|            | Lmain  |     |     |                            | N    | N            | N       | N   | Y   |
| A1013      | RCA    | 49  | M   | Non-ischemic CM            | N    | N            | Y       | Y   | Y   |

Abbreviations for Supplemental Tables 1-4: LAD = left anterior descending coronary artery; RCA = right coronary artery; LCX = left circumflex artery; Lmain = proximal left coronary artery; pr = proximal region of vessel; m = mid region of vessel; di = distal region of vessel; CM = cardiomyopathy; V-tach = ventricular tachycardia; ASD = atrial septal defect; HD = heart defect; ARVC = arrhythmogenic right ventricular cardiomyopathy; Movat's = Movat's pentachrome stain; PSR = picrosirius red stain; SHG = second harmonic generation.

\*\*numbers following vessel name (e.g. RCA2) refer to non-contiguous segments of the same vessel from the same patient.

**Supplemental Table 3: Atherosclerotic Hyperplasia Coronary Artery Samples**

| Identifier | Vessel | Age | Sex | Pathology                  | PTEN | $\alpha$ SMA | Movat's | PSR | SHG |
|------------|--------|-----|-----|----------------------------|------|--------------|---------|-----|-----|
| A0976      | RCA    | 59  | F   | Aneurysm, hypertension     | Y    | Y            | N       | N   | N   |
| A0990      | LAD    | 61  | M   | ARVC                       | Y    | Y            | N       | N   | N   |
|            | RCA    |     |     |                            | Y    | Y            | N       | N   | N   |
| A0998      | Lmain  | 63  | M   | Non-ischemic CM            | Y    | Y            | N       | N   | N   |
| A1001      | Lmain  | 28  | F   | Congenital Epstein anomaly | Y    | Y            | N       | N   | N   |
| A1007      | Lmain  | 24  | M   | Non-ischemic CM            | Y    | Y            | N       | N   | N   |
|            | RCA    |     |     |                            | Y    | Y            | N       | N   | N   |
| A1013      | LCX    | 49  | M   | Non-ischemic CM            | Y    | Y            | N       | N   | N   |
|            | RCA    |     |     |                            | Y    | Y            | N       | N   | N   |
| A1016      | pRCA   | 51  | F   | ASD congenital HD          | Y    | Y            | N       | N   | N   |
| A1017      | diRCA  | 57  | M   | Adriamycin CM              | Y    | Y            | N       | N   | N   |
| A1024      | pRCA   | 58  | F   | Non-failing donor          | Y    | Y            | N       | N   | N   |
| A1033      | LCX    | 69  | M   | Hypertrophic CM            | Y    | Y            | N       | N   | N   |
|            | Lmain  |     |     |                            | Y    | Y            | N       | N   | N   |
|            | mLAD   |     |     |                            | Y    | Y            | N       | N   | N   |
|            | RCA    |     |     |                            | Y    | Y            | N       | N   | N   |

**Supplemental Table 4: Complex Plaque Coronary Artery Samples**

| Identifier | Vessel | Age | Sex | Pathology               | PTEN | $\alpha$ SMA | Movat's | PSR | SHG |
|------------|--------|-----|-----|-------------------------|------|--------------|---------|-----|-----|
| A0976      | LCX    | 59  | F   | Aneurysm, hypertension  | Y    | Y            | N       | N   | N   |
| A0997      | Lmain  | 45  | M   | Non-ischemic CM         | Y    | Y            | N       | N   | N   |
|            | mLCX   |     |     |                         | Y    | Y            | N       | N   | N   |
|            | RCA    |     |     |                         | Y    | Y            | N       | N   | N   |
| A0998      | LAD    | 63  | M   | Non-ischemic CM         | Y    | Y            | N       | N   | N   |
| A1010      | Lmain  | 45  | M   | Familial CM V-tach      | Y    | Y            | N       | N   | N   |
|            | RCA    |     |     |                         | Y    | Y            | N       | N   | N   |
| A1019      | diLAD  | 57  | M   | Ischemic CM             | Y    | Y            | N       | N   | N   |
| A1024      | mLCX   | 58  | F   | Non-failing donor       | Y    | Y            | N       | N   | N   |
| A1035      | mLCX   | 47  | M   | Hypertrophic CM         | Y    | Y            | N       | N   | N   |
| A1036      | Lmain  | 55  | M   | Non-ischemic CM-sarcoid | Y    | Y            | N       | N   | N   |
| A0937      | RCA    | 43  | M   | Non-failing donor       | Y    | Y            | N       | N   | N   |
| A0920      | LCX1   | 60  | M   | Ischemic CM             | Y    | Y            | N       | N   | N   |
|            | Lmain  |     |     |                         | Y    | Y            | N       | N   | N   |

| Identifier | Vessel | Age | Sex | Pathology              | PTEN | αSMA | Movat's | PSR | SHG |
|------------|--------|-----|-----|------------------------|------|------|---------|-----|-----|
| A0921      | RCA    | 31  | M   | Non-iscemic CM         | Y    | Y    | N       | N   | N   |
| A1012      | LCX1   | 39  | F   | Non-iscemic CM         | Y    | Y    | N       | Y   | Y   |
|            | RCA2   |     |     |                        | N    | N    | Y       | N   | N   |
|            | LAD3   |     |     |                        | N    | N    | Y       | Y   | Y   |
|            | LAD1   |     |     |                        | N    | N    | Y       | Y   | Y   |
|            | LCX2   |     |     |                        | N    | N    | Y       | Y   | N   |
| A1020      | RCA4   | 44  | M   | Non-iscemic CM         | Y    | Y    | N       | Y   | Y   |
|            | mRCA2  |     |     |                        | N    | N    | Y       | Y   | N   |
|            | mRCA1  |     |     |                        | N    | N    | N       | Y   | Y   |
| A1023      | prRCA  | 26  | M   | Non-iscemic CM (viral) | Y    | Y    | Y       | Y   | Y   |
|            | mRCA4  |     |     |                        | N    | N    | Y       | N   | N   |
| A1025      | Lmain  | 38  | M   | Non-iscemic CM         | Y    | Y    | Y       | Y   | Y   |
|            | prRCA  |     |     |                        | N    | N    | N       | Y   | N   |
|            | mRCA2  |     |     |                        | N    | N    | Y       | N   | N   |
|            | diRCA1 |     |     |                        | N    | N    | Y       | Y   | Y   |
| A1032      | RCA1   | 37  | M   | Non-iscemic CM         | Y    | Y    | Y       | Y   | Y   |
|            | LCX    |     |     |                        | Y    | Y    | N       | N   | N   |
|            | RCA2   |     |     |                        | Y    | Y    | Y       | N   | N   |
|            | pRCA1  |     |     |                        | N    | N    | Y       | N   | N   |
| A0917      | RCA    | 27  | M   | Familial CM            | Y    | Y    | N       | N   | N   |
|            | LAD    |     |     |                        | Y    | Y    | N       | N   | N   |
| A1028      | mRCA   | 49  | M   | Ischemic CM            | Y    | Y    | N       | Y   | Y   |
| A1037      | mRCA   | 40  | M   | Non-iscemic CM         | Y    | Y    | N       | N   | N   |
| A0989      | Lmain  | 57  | F   | Ischemic CM            | N    | N    | Y       | N   | N   |
| A1030      | LCX    | 56  | F   | Non-iscemic CM-sarcoid | N    | N    | Y       | N   | N   |
| A1005      | RCA1   | 31  | M   | Non-iscemic CM         | N    | N    | Y       | Y   | Y   |
| A1045      | LAD    | 56  | F   | Ischemic CM            | N    | N    | Y       | N   | N   |
|            | LCX2   |     |     |                        | N    | N    | Y       | Y   | N   |
| A0991      | LCX    | 55  | F   | Ischemic CM            | N    | N    | Y       | N   | N   |
|            | LAD    |     |     |                        | N    | N    | Y       | N   | N   |
| A1051      | pRCA2  | 66  | M   | Ischemic CM            | N    | N    | Y       | N   | N   |
| A1048      | pRCA2  | 66  | M   | Non-iscemic CM         | N    | N    | Y       | N   | N   |
| A0926      | RCA    | 30  | M   | Familial NI CM         | N    | N    | N       | Y   | Y   |



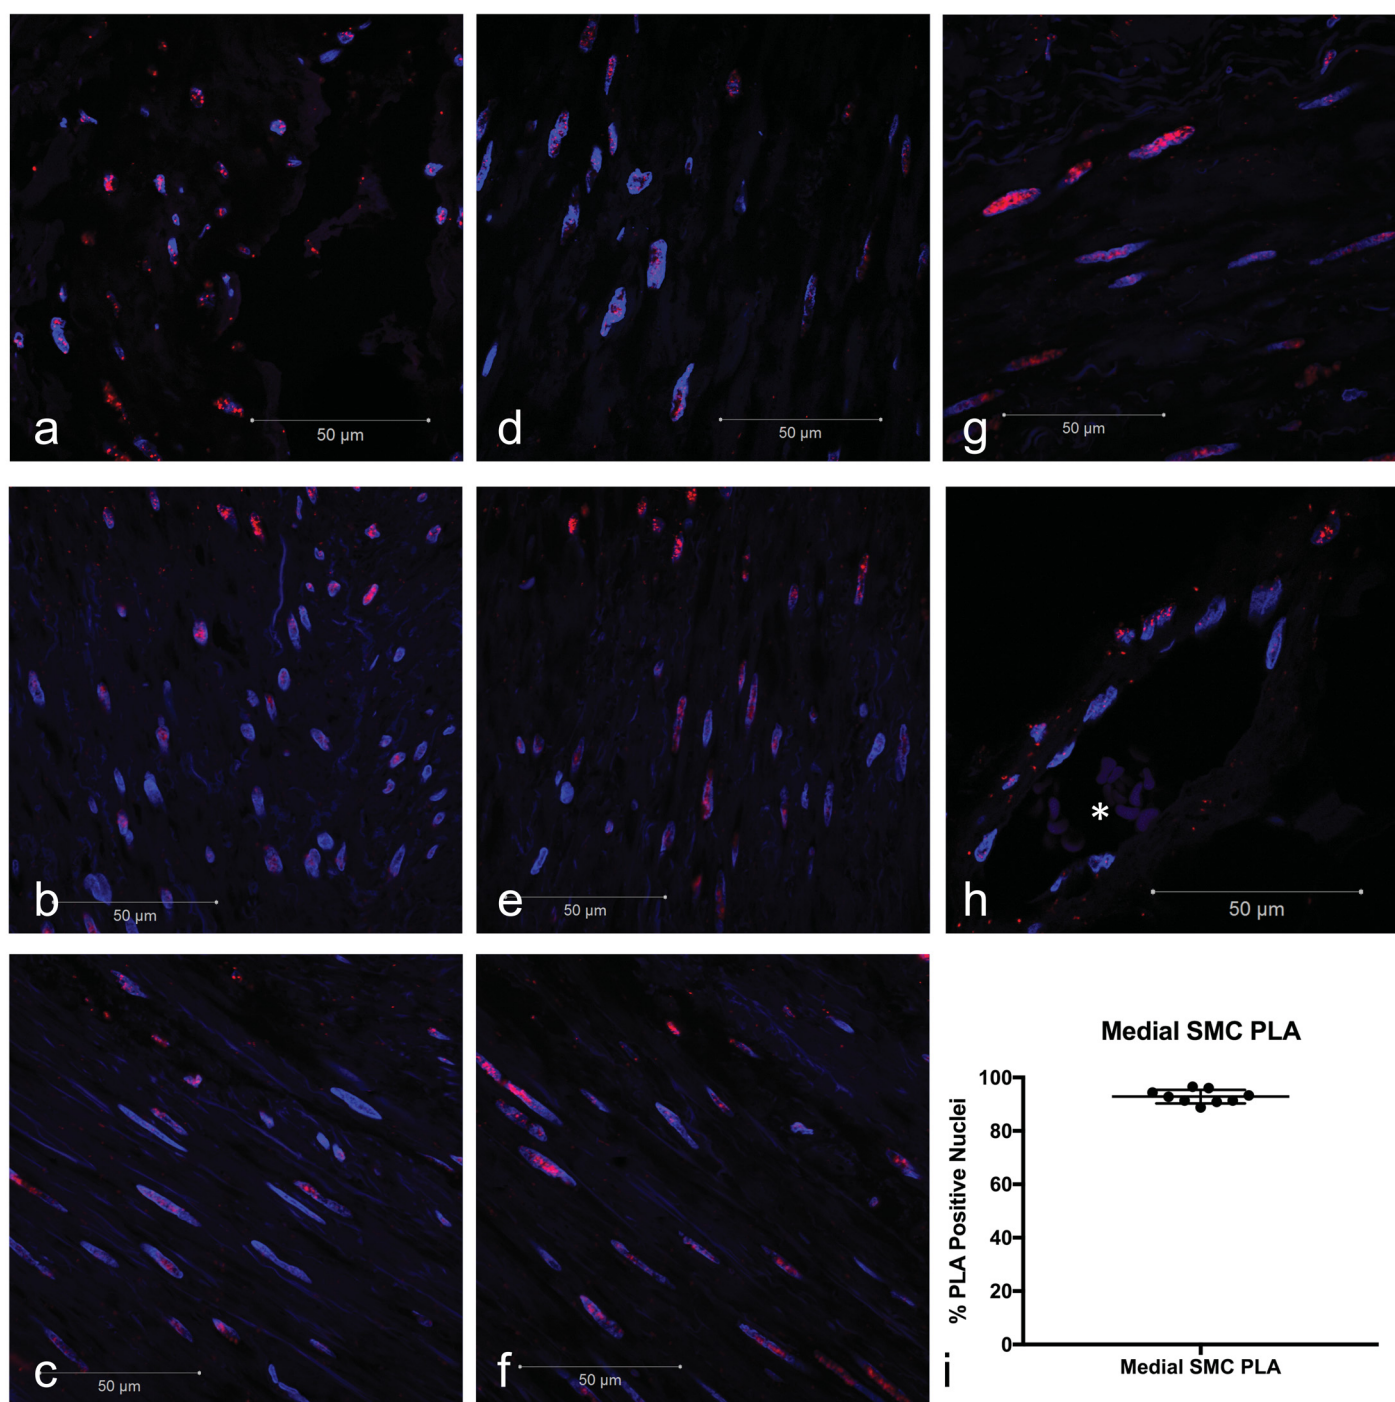

**Supplemental Figure 1. Proximity Ligation Assay Showing Interaction of PTEN and Serum Response Factor (SRF) in the Nucleus of Medial Smooth Muscle Cells (SMCs).** Proximity ligation assay (PLA) and confocal microscopy were used to detect PTEN-SRF interactions in medial SMCs of human non-atherosclerotic coronary arteries. **(a-g)**. PLA using mouse anti-PTEN and rabbit anti-SRF primary antibodies and anti-mouse PLUS and anti-rabbit MINUS PLA probe demonstrates PTEN-SRF nuclear interactions in medial SMCs of human NAH coronary. Shown are several representative images from an N=4 vessels. **(h)**. Positive PTEN-SRF PLA signal in SMCs of an adventitial vasa vasorum microvessel. \* = red blood cells in lumen of microvessel. For panels a-h: Red = Positive PLA; Blue = DAPI for cell nuclei; Scale bars = 50  $\mu$ m. **(i)**. Nuclei of medial SMCs were scored for percent positive PLA signal. 9 representative images from N=4 individual non-atherosclerotic arteries from N=4 patients.

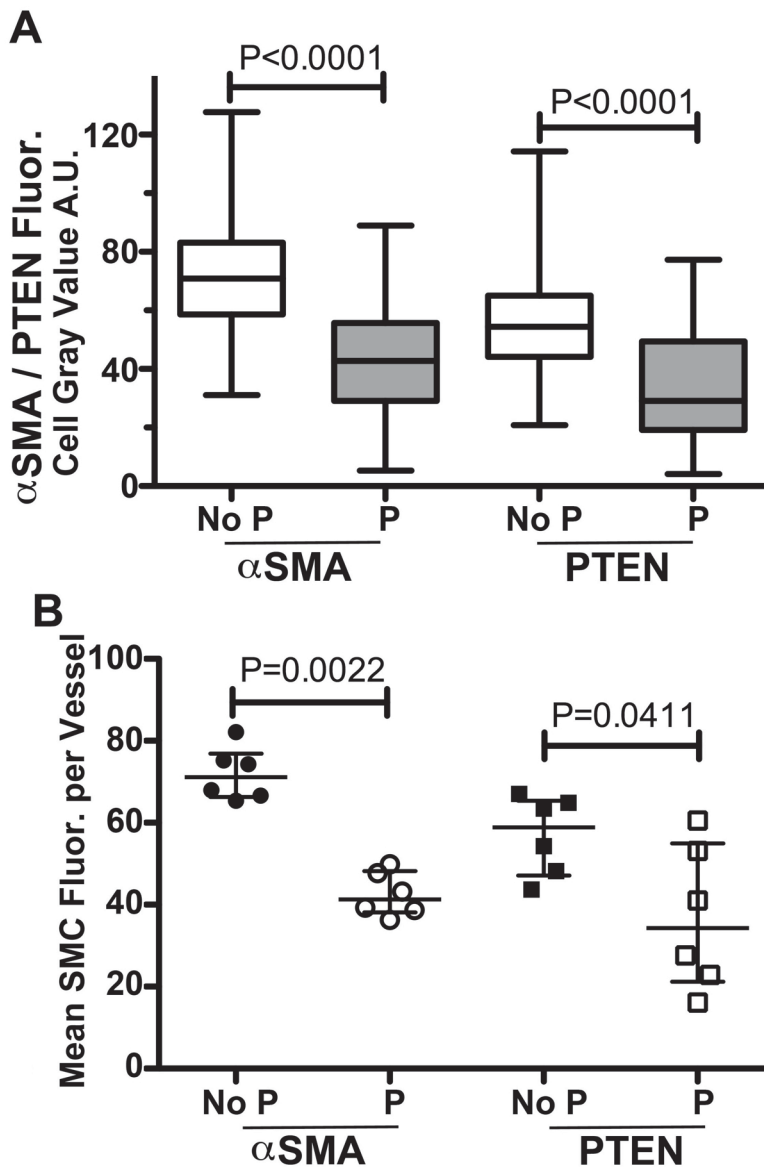

**Supplemental Figure 2. Reduced PTEN and alpha-Smooth Muscle Actin ( $\alpha\text{SMA}$ ) in Medial Smooth Muscle Cells (SMCs) adjacent to atherosclerotic plaques.** Paired vessel segments with and without atherosclerotic plaque (P, No P) from the same coronary artery were stained for PTEN and  $\alpha\text{SMA}$ . Confocal microscopy was performed with the same image acquisition parameters used for single cell analysis of Figures 3 and 6. Four to five 63X images were acquired for each pair of atherosclerotic and non-atherosclerotic segments from the same coronary artery and independent heart. **A).** The mean gray values of  $\alpha\text{SMA}$  and PTEN within the cell boundary were determined by Image J in 216 individual media cells of arteries with no plaque (open box) and 237 individual cells of media with adjacent atherosclerotic plaque (gray box) from N=6 vessels and independent hearts. Box and whisker data plots indicate the median gray value (bar), interquartile range (box boundary) and minimum to maximum range (error bars) of data values. **B)** The mean gray values for  $\alpha\text{SMA}$  (circles) and PTEN (squares) of individual SMCs were averaged for each vessel (No P segment, filled; P segment, open). Exact P values are shown for Mann Whitney, two-tailed, t test comparisons of  $\alpha\text{SMA}$  and PTEN gray values between coronary artery segments with and without adjacent plaque.

## Supplemental Table 6: Mouse Plasma Cholesterol and Triglyceride Levels

|                             | Normal Chow         |                    |        | Western Diet 0.15% cholesterol |                     |        |
|-----------------------------|---------------------|--------------------|--------|--------------------------------|---------------------|--------|
|                             | WT                  | KO                 | t-test | WT                             | KO                  | t-test |
| <b>Number</b>               | 6                   | 7                  |        | 6                              | 5                   |        |
| <b>Plasma Chol. (mg/dl)</b> | 100.2 (67.5-140.3)  | 119.5 (47.5-206.2) | 0.7308 | 559.2 (513.6-593)              | 654.9 (614.5-703.9) | 0.0173 |
| <b>Plasma TG (mg/dl)</b>    | 175.7 (144.7-213.6) | 136.7 (133.4-176)  | 0.0734 | 228.4 (182.2-257.4)            | 141.2 (114.1-188.5) | 0.0303 |
| <b>Weight (gm)</b>          | 29.4 (28.2-31.7)    | 30.5 (29.1-3.15)   | 0.6282 | 32.8 (31.3-34.4)               | 28.0 (27.3-30.2)    | 0.0173 |

All variables are median values with (interquartile range)

Mann Whitney t-test of WT versus KO for each diet condition.



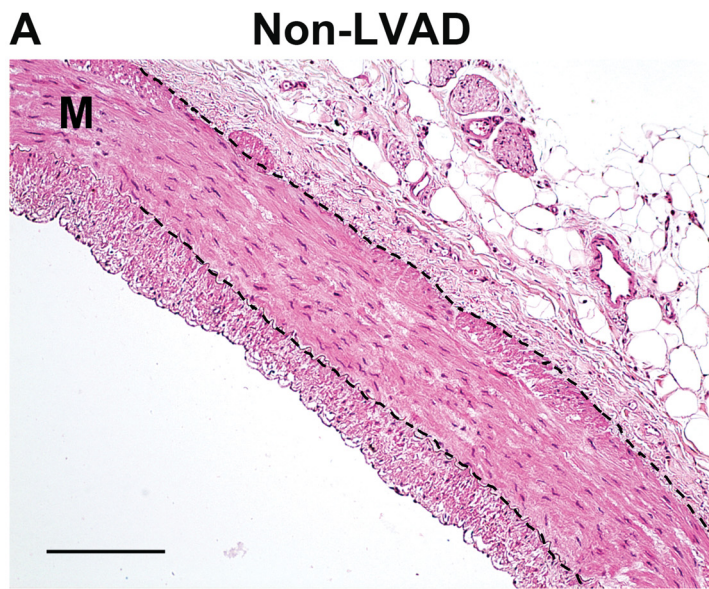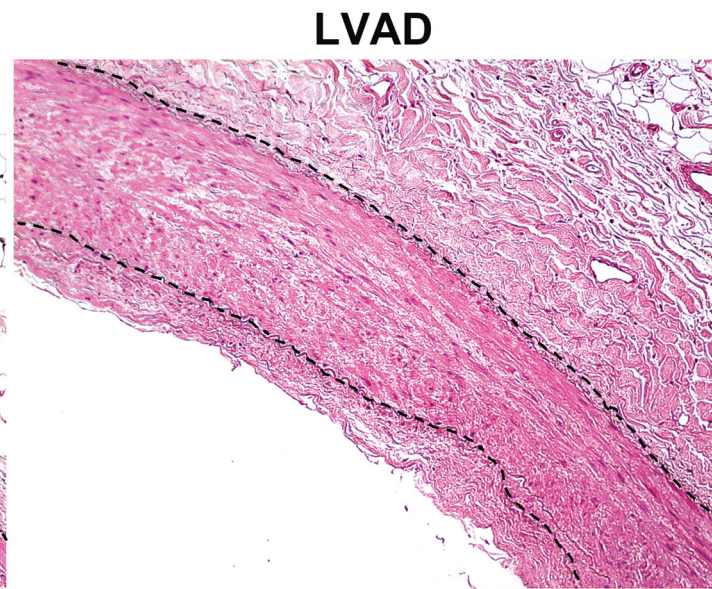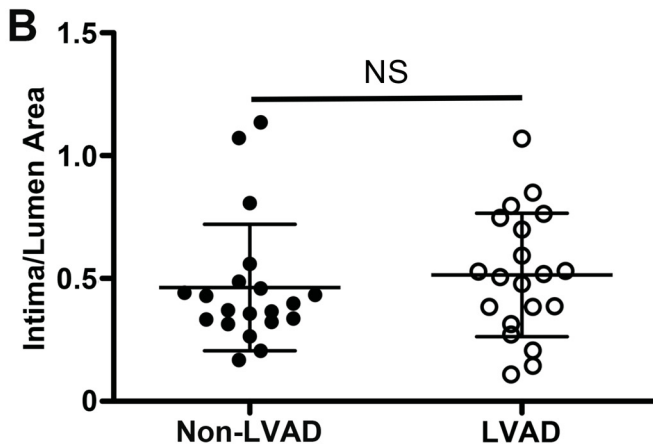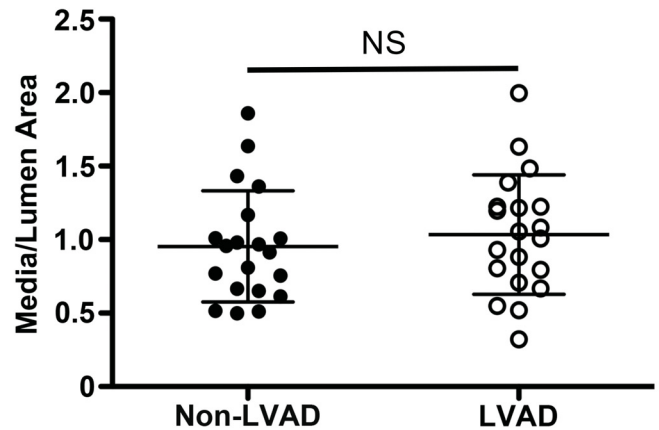

**Supplemental Figure 3. Matched Intima and Media Thickness Between Coronary Arteries Exposed or not Exposed to Continuous Flow Left Ventricular Assist Devices (LVAD).** Coronary arteries from explanted hearts of non-LVAD or CF-LVAD patients were matched for NAH. **A).** Representative H&E images showing similar intimal non-atherosclerotic hyperplasia in non-LVAD-exposed (left) compared CF-LVAD-exposed (right) vessels, and similar medial thickness when normalized to lumen diameter. Dashed lines delineate the arterial media; M = arterial media; I = arterial intima; scale bars = 100  $\mu$ m. **B).** Intima areas (left graph) and media areas (right graph) of the coronary arteries were measured by Image J and normalized to the area of the vessel lumen to control for differences in vessel caliber. N=20 individual vessels per group. Compared to non-LVAD vessels, CF-LVAD vessels exhibited no change in relative intima or media areas (Two tailed Student's t tests,  $P=0.5305$  for intima;  $P=0.5222$  for media). Error bar represents mean  $\pm$  standard deviation.



1173 Genes

865 Genes

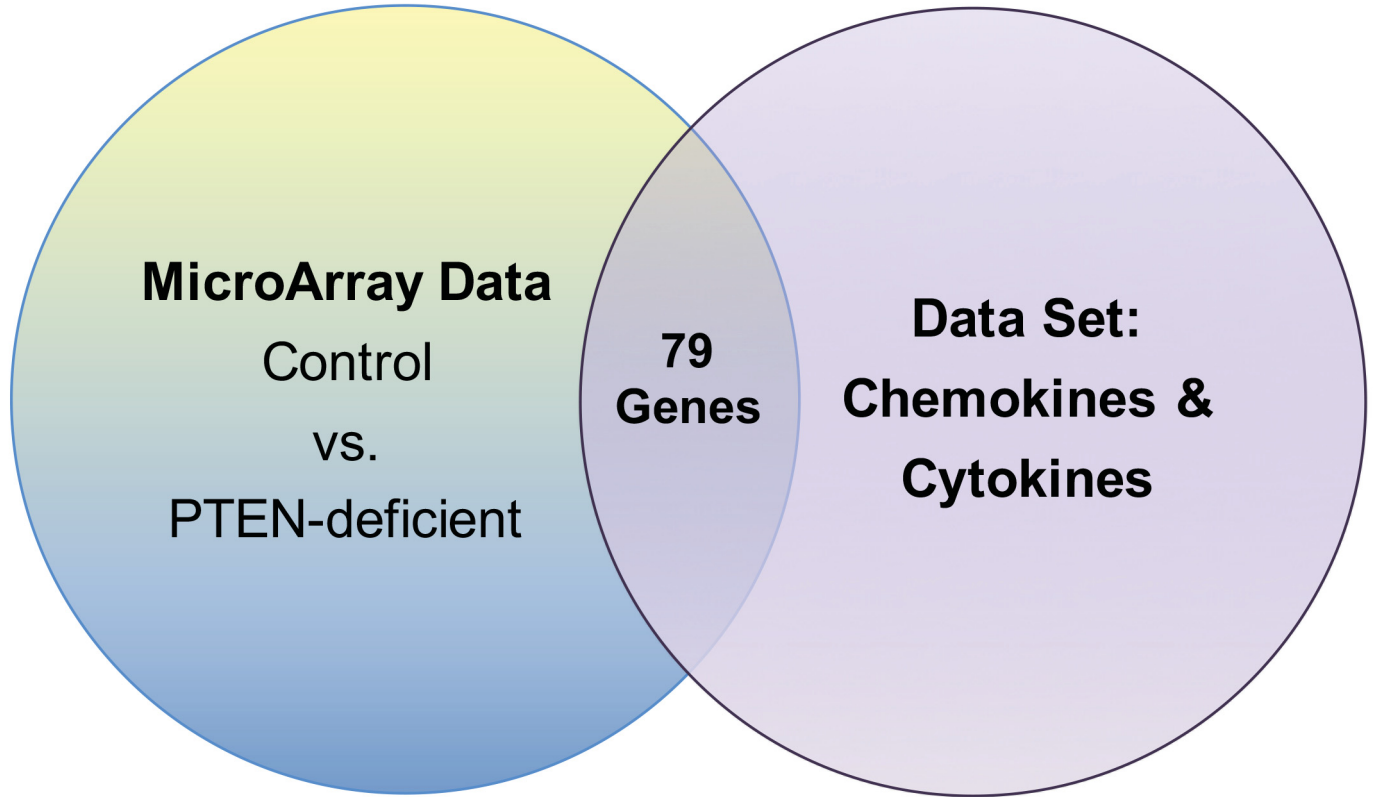

**Supplemental Figure 4. Significantly Differentiated Genes Within Previously Published Datasets of Chemokine- and Cytokine-Associated Genes.** 1173 differentially expressed genes were compared to previously published datasets of chemokine- and cytokine-associated genes. 79 genes were identified as commonly expressed in the PTEN-deficient SMC microarray and previously published chemokine / cytokine datasets.

1173 Genes

3525 Genes

**MicroArray Data**  
Control  
vs.  
PTEN-deficient

**118  
Genes**

**Data Set:  
Extracellular  
Matrix**

**Supplemental Figure 5. Significantly Differentiated Genes Within Previously Published Datasets of Matrix-Associated Genes.** 1173 differentially expressed genes were compared to previously published datasets of extracellular matrix- and matrix remodeling-associated genes. 118 genes were identified as commonly expressed in the PTEN-deficient SMC microarray and previously published extracellular matrix datasets.

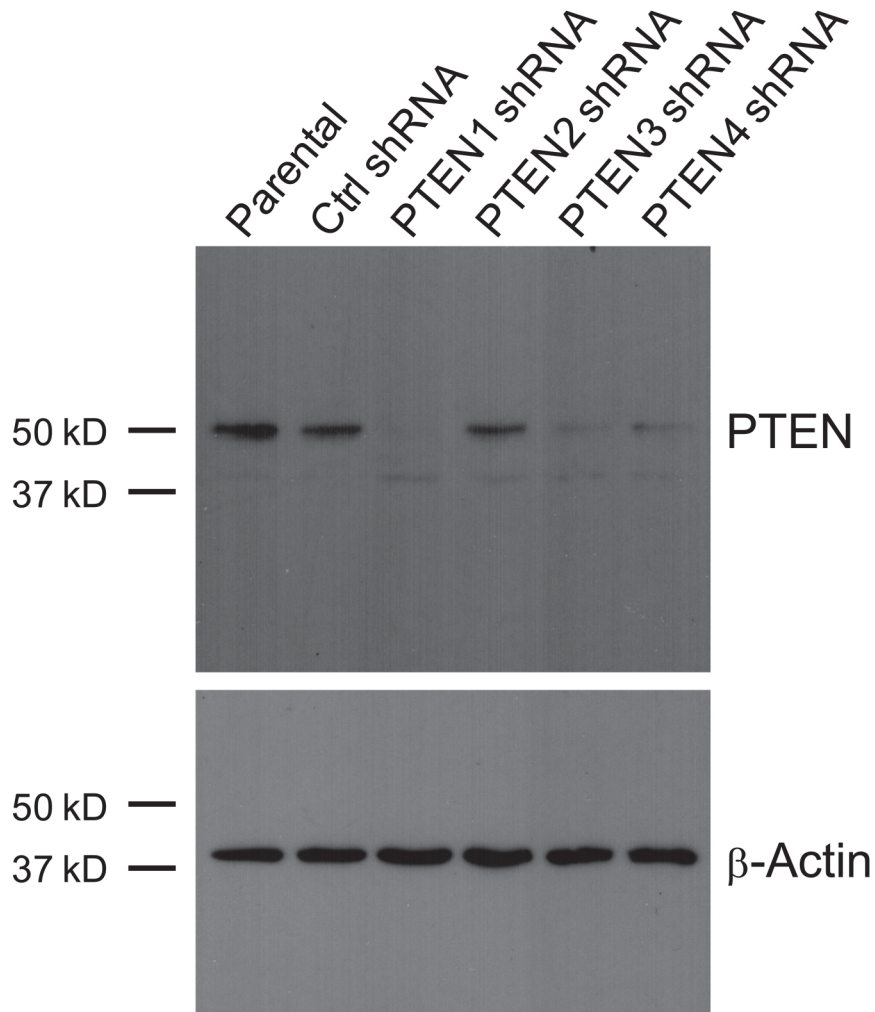

**Supplemental Figure 6. Representative Western blot showing decreased PTEN expression in PTEN-deficient Smooth Muscle Cells (SMCs).** Pools of SMCs stably expressing control (Ctrl) or PTEN-specific shRNA were serum-restricted for 72 h. Whole cell lysates were analyzed for total PTEN levels. Parental (non-infected) SMCs were used as a control for shRNA viral infection.  $\beta$ -Actin was used as a loading control.

**Supplemental Table 7: Cytokine-associated Upregulated Genes In PTEN-Deficient SMCs**

| Gene Symbol | Gene Accession     | Gene Description                                                  |
|-------------|--------------------|-------------------------------------------------------------------|
| Acvr2a      | NM 031571          | activin A receptor, type IIA                                      |
| Adcy8       | NM 017142          | adenylate cyclase 8 (brain)                                       |
| Bmp2        | NM 017178          | bone morphogenetic protein 2                                      |
| C1s         | NM 138900          | complement component 1, s subcomponent                            |
| C2          | NM 172222          | complement component 2                                            |
| C3          | NM 016994          | complement component 3                                            |
| C6          | NM 176074          | complement component 6                                            |
| Ccl11       | NM 019205          | chemokine (C-C motif) ligand 11                                   |
| Ccl2        | NM 031530          | chemokine (C-C motif) ligand 2                                    |
| Ccl20       | NM 019233          | chemokine (C-C motif) ligand 20                                   |
| Ccl7        | NM 001007612       | chemokine (C-C motif) ligand 7                                    |
| Cd55        | NM 022269          | Cd55 molecule                                                     |
| Cfh         | BC089845           | complement factor H                                               |
| Clcf1       | NM 207615          | cardiotrophin-like cytokine factor 1                              |
| Ctsk        | NM 031560          | cathepsin K                                                       |
| Cxcl1       | NM 030845          | chemokine (C-X-C motif) ligand 1                                  |
| Cxcl13      | NM 001017496       | chemokine (C-X-C motif) ligand 13                                 |
| Cxcl3       | NM 138522          | chemokine (C-X-C motif) ligand 3                                  |
| Cxcl6       | NM 022214          | chemokine (C-X-C motif) ligand 6                                  |
| Dnm1        | NM 080689          | dynamamin 1                                                       |
| Dusp6       | NM 053883          | dual specificity phosphatase 6                                    |
| Fgf1        | NM 012846          | fibroblast growth factor 1                                        |
| Fgf7        | NM 022182          | fibroblast growth factor 7                                        |
| Fgfr2       | NM 012712          | fibroblast growth factor receptor 2                               |
| Gnai1       | NM 013145          | guanine nucleotide binding protein, alpha inhibiting 1            |
| Gng8        | NM 139185          | guanine nucleotide binding protein, gamma 8                       |
| Hgf         | NM 017017          | hepatocyte growth factor                                          |
| Il13ra1     | NM 145789          | interleukin 13 receptor, alpha 1                                  |
| Il18bp      | NM 053374          | interleukin 18 binding protein                                    |
| Il1f10      | NM 001108571       | interleukin 1 family, member 10                                   |
| Il1f9       | NM 001113790       | interleukin 1 family, member 9                                    |
| Il1r2       | NM 053953          | interleukin 1 receptor, type II                                   |
| Il1rap      | NM 012968          | interleukin 1 receptor accessory protein                          |
| Il1rn       | NM 022194          | interleukin 1 receptor antagonist                                 |
| Il20rb      | DQ222846           | interleukin 20 receptor beta                                      |
| Il6         | NM 012589          | interleukin 6                                                     |
| Inhba       | NM 017128          | inhibin beta-A                                                    |
| Jak2        | NM 031514          | Janus kinase 2                                                    |
| Kitlg       | NM 021843          | KIT ligand                                                        |
| Lbp         | NM 017208          | lipopolysaccharide binding protein                                |
| Lgals3      | NM 031832          | lectin, galactoside-binding, soluble, 3                           |
| Nfkb1       | ENSRNOT00000036838 | nuclear factor kappa light polypeptide gene enhancer in B-cells 1 |
| Nod1        | NM 001109236       | nucleotide-binding oligomerization domain containing 1            |
| Osmr        | NM 001005384       | oncostatin M receptor                                             |
| Pdgfc       | NM 031317          | platelet derived growth factor C                                  |
| Pros1       | NM 031086          | protein S (alpha)                                                 |
| Sdf2l1      | NM 001109433       | stromal cell-derived factor 2-like 1                              |
| Shc4        | ENSRNOT00000011084 | SHC (Src homology 2 domain containing) family, member 4           |
| Tlr2        | NM 198769          | toll-like receptor 2                                              |
| Tnfrsf12a   | NM 181086          | tumor necrosis factor receptor superfamily, member 12a            |
| Tnfrsf1b    | NM 130426          | tumor necrosis factor receptor superfamily, member 1b             |
| Tnfrsf22    | XM 001066154       | tumor necrosis factor receptor superfamily, member 22             |
| Tnfrsf9     | NM 001025773       | tumor necrosis factor receptor superfamily, member 9              |
| Ube2l6      | NM 001024755       | ubiquitin-conjugating enzyme E2L 6                                |
| Vegfa       | NM 031836          | vascular endothelial growth factor A                              |



**Supplemental Table 8: Cytokine-associated Downregulated Genes In PTEN-Deficient SMCs**

| Gene Symbol | Gene Accession     | Gene Description                                              |
|-------------|--------------------|---------------------------------------------------------------|
| Adcy2       | NM_031007          | adenylate cyclase 2 (brain)                                   |
| Adcy3       | NM_130779          | adenylate cyclase 3                                           |
| Akt3        | NM_031575          | v-akt murine thymoma viral oncogene homolog 3                 |
| Bcl2        | NM_016993          | B-cell CLL/lymphoma 2                                         |
| Cx3cl1      | NM_134455          | chemokine (C-X3-C motif) ligand 1                             |
| Dkk3        | NM_138519          | dickkopf homolog 3 (Xenopus laevis)                           |
| Fos         | NM_022197          | FBJ osteosarcoma oncogene                                     |
| Ikbkb       | NM_053355          | inhibitor of kappa light polypeptide gene enhancer in B-cells |
| Ikbkg       | NM_199103          | inhibitor of kappaB kinase gamma                              |
| Il15        | NM_013129          | interleukin 15                                                |
| Il1rl1      | NM_001127689       | interleukin 1 receptor-like 1                                 |
| Il33        | NM_001014166       | interleukin 33                                                |
| Lifr        | NM_031048          | leukemia inhibitory factor receptor alpha                     |
| Map3k1      | NM_053887          | mitogen activated protein kinase kinase kinase 1              |
| Mapkapk3    | NM_001012127       | mitogen-activated protein kinase-activated protein kinase 3   |
| Met         | NM_031517          | met proto-oncogene                                            |
| Plcb4       | NM_024353          | phospholipase C, beta 4                                       |
| Rock1       | NM_031098          | Rho-associated coiled-coil containing protein kinase 1        |
| Tgfb2       | NM_031131          | transforming growth factor, beta 2                            |
| Tgfb3       | NM_013174          | transforming growth factor, beta 3                            |
| Tnfrsf11b   | NM_012870          | tumor necrosis factor receptor superfamily, member 11b        |
| Tnfsf18     | ENSRNOT00000039221 | tumor necrosis factor (ligand) superfamily, member 18         |
| Txnip       | NM_001008767       | thioredoxin interacting protein                               |
| Vegfc       | NM_053653          | vascular endothelial growth factor C                          |

**Supplemental Table 9: ECM-associated Upregulated Genes In PTEN-Deficient SMCs**

| Gene Symbol | Gene Accession     | Gene Description                                               |
|-------------|--------------------|----------------------------------------------------------------|
| Adam12      | BC167765           | ADAM metallopeptidase domain 12                                |
| Adamts4     | AB042272           | ADAM metallopeptidase with thrombospondin type 1 motif, 4      |
| Adamts8     | NM_001106811       | ADAM metallopeptidase with thrombospondin type 1 motif, 8      |
| Adamts1     | XM_001061448       | ADAMTS-like 1                                                  |
| Adamts3     | NM_001107533       | ADAMTS-like 3                                                  |
| Aebp1       | NM_001100970       | AE binding protein 1                                           |
| Angpt1      | NM_053546          | angiopoietin 1                                                 |
| B3gat3      | NM_001128184       | beta-1,3-glucuronyltransferase 3 (glucuronosyltransferase 1)   |
| Cd109       | NM_001108771       | CD109 molecule                                                 |
| Clec11a     | NM_001012459       | C-type lectin domain family 11, member a                       |
| Clu         | NM_053021          | clusterin                                                      |
| Col15a1     | ENSRNOT00000017217 | collagen, type XV, alpha 1                                     |
| Col4a1      | NM_001135009       | collagen, type IV, alpha 1                                     |
| Col4a2      | XM_001076134       | collagen, type IV, alpha 2                                     |
| Col6a3      | NM_001109008       | procollagen, type VI, alpha 3                                  |
| Colec12     | NM_001025721       | collectin sub-family member 12                                 |
| Ctsh        | NM_012939          | cathepsin H                                                    |
| Dcn         | NM_024129          | decorin                                                        |
| Egfl7       | NM_139104          | EGF-like-domain, multiple 7                                    |
| Esm1        | NM_022604          | endothelial cell-specific molecule 1                           |
| Fam20c      | NM_001012238       | family with sequence similarity 20, member C                   |
| Fbln1       | NM_001127547       | fibulin 1                                                      |
| Fndc1       | NM_001038615       | fibronectin type III domain containing 1                       |
| Frzb        | NM_001100527       | frizzled-related protein                                       |
| Fst         | NM_012561          | follistatin                                                    |
| Grem1       | NM_019282          | gremlin 1, cysteine knot superfamily, homolog (Xenopus laevis) |
| Has1        | NM_172323          | hyaluronan synthase 1                                          |
| Hpse        | NM_022605          | heparanase                                                     |
| Hpx         | NM_053318          | hemopexin                                                      |
| Htra1       | NM_031721          | HtrA serine peptidase 1                                        |
| Htra3       | ENSRNOT00000010852 | HtrA serine peptidase 3                                        |
| Itga7       | NM_030842          | integrin alpha 7                                               |
| Itgb8       | NM_001108726       | integrin beta 8                                                |
| Lama4       | NM_001107635       | laminin, alpha 4                                               |
| Loxl4       | NM_001107592       | lysyl oxidase-like 4                                           |
| Ltp1        | NM_021587          | latent transforming growth factor beta binding protein 1       |
| Lum         | NM_031050          | lumican                                                        |
| Mgp         | NM_012862          | matrix Gla protein                                             |
| Mmp19       | NM_001107159       | matrix metallopeptidase 19                                     |
| Mmp2        | NM_031054          | matrix metallopeptidase 2                                      |
| Nid2        | NM_001012005       | nidogen 2                                                      |
| Ntn1        | NM_053731          | netrin 1                                                       |
| Plod1       | NM_053827          | procollagen-lysine 1, 2-oxoglutarate 5-dioxygenase 1           |
| Podnl1      | ENSRNOT00000037453 | podocan-like 1                                                 |
| Prg4        | NM_001105962       | proteoglycan 4, (megakaryocyte stimulating factor)syndrome)    |
| Sema3a      | NM_017310          | short basic domain, secreted, (semaphorin) 3A                  |
| Sema3c      | NM_001106578       | short basic domain, secreted, (semaphorin) 3C                  |
| Sema3e      | NM_001106579       | short basic domain, secreted, (semaphorin) 3E                  |
| Serp1b7     | NM_130404          | serine (or cysteine) peptidase inhibitor, clade B, member 7    |
| Serpine2    | NM_019197          | serine (or cysteine) peptidase inhibitor, clade E, member 2    |
| Serpin1     | NM_199093          | serine (or cysteine) peptidase inhibitor, clade G, member 1    |
| Serpin1     | NM_053779          | serine (or cysteine) peptidase inhibitor, clade I, member 1    |
| Sfrp2       | NM_001100700       | secreted frizzled-related protein 2                            |
| Sfrp4       | NM_053544          | secreted frizzled-related protein 4                            |
| Slpi        | NM_053372          | secretory leukocyte peptidase inhibitor                        |
| Srpx        | NM_022524          | sushi-repeat-containing protein, X-linked                      |
| Sv2a        | NM_057210          | synaptic vesicle glycoprotein 2a                               |
| Tgfa        | NM_012671          | transforming growth factor alpha                               |
| Timp1       | NM_053819          | TIMP metallopeptidase inhibitor 1                              |
| Tnn         | NM_001107189       | tenascin N                                                     |
| Vcan        | AF072892           | versican                                                       |
| Vwa5a       | NM_198755          | von Willebrand factor A domain containing 5A                   |

**Supplemental Table 10: ECM-associated Downregulated Genes In PTEN-Deficient SMCs**

| Gene Symbol | Gene Accession      | Gene Description                                          |
|-------------|---------------------|-----------------------------------------------------------|
| Adams12     | NM_001106420        | ADAM metallopeptidase with thrombospondin type 1 motif 12 |
| Adams9      | NM_001107877        | ADAM metallopeptidase with thrombospondin type 1 motif 9  |
| Angptl2     | NM_133569           | angiopoietin-like 2                                       |
| Anxa8       | NM_001031654        | annexin A8                                                |
| Aspn        | NM_001014008        | asporin                                                   |
| Bmp3        | NM_017105           | bone morphogenetic protein 3                              |
| Bmp4        | NM_012827           | bone morphogenetic protein 4                              |
| Bmp6        | NM_013107           | bone morphogenetic protein 6                              |
| Btc         | NM_022256           | betacellulin                                              |
| Cav1        | NM_031556           | caveolin 1, caveolae protein                              |
| Cav2        | NM_131914           | caveolin 2                                                |
| Col11a1     | ENSRNOT00000024138  | collagen, type XI, alpha 1                                |
| Col4a5      | ENSRNOT00000025677  | collagen, type IV, alpha 5                                |
| Crispld2    | NM_138518           | cysteine-rich secretory protein LCCL domain containing 2  |
| Ctgf        | NM_022266           | connective tissue growth factor                           |
| E2f5        | ENSRNOT00000014361  | E2F transcription factor 5                                |
| Eln         | NM_012722           | elastin                                                   |
| Ereg        | NM_021689           | epiregulin                                                |
| Fbln2       | ENSRNOT00000009696  | fibulin 2                                                 |
| Fbln5       | NM_019153           | fibulin 5                                                 |
| Fmod        | NM_080698           | fibromodulin                                              |
| Fras1       | ENSRNOT00000002814  | Fraser extracellular matrix complex subunit 1             |
| Gdf6        | NM_001013038        | growth differentiation factor 6                           |
| Gpc4        | NM_001014108        | glypican 4                                                |
| Hmcn1       | ENSRNOT00000030951  | hemicentin 1                                              |
| Hmnr        | NM_012964           | hyaluronan mediated motility receptor (RHAMM)             |
| Hs6st1      | NM_001108210        | heparan sulfate 6-O-sulfotransferase 1                    |
| Id2         | NM_013060           | inhibitor of DNA binding 2                                |
| Itga1       | NM_030994           | integrin alpha 1                                          |
| Itga11      | NM_001108156        | integrin, alpha 11                                        |
| Itga4       | NM_001107737        | integrin alpha 4                                          |
| Itga6       | ENSRNOT00000045394  | integrin, alpha 6                                         |
| Matn2       | ENSRNOT00000008361  | matrilin 2                                                |
| Megf9       | NM_001107940        | multiple EGF-like domains 9                               |
| Mfap4       | NM_001034124        | microfibrillar-associated protein 4                       |
| Mfap5       | NM_001108644        | microfibrillar associated protein 5                       |
| Mmp28       | NM_001079888        | matrix metallopeptidase 28 (epilysin)                     |
| Nrg1        | NM_031588           | neuregulin 1                                              |
| Omd         | NM_031817           | osteomodulin                                              |
| P4ha3       | NM_198775           | procollagen-proline 4-hydroxylase, alpha polypeptide III  |
| Pcsk5       | ENSRNOT000000054793 | proprotein convertase subtilisin/kexin type 5             |
| Pdgfd       | NM_023962           | platelet-derived growth factor, D polypeptide             |
| Pik3ip1     | NM_001017453        | phosphoinositide-3-kinase interacting protein 1           |
| Plxna2      | NM_001105988        | plexin A2                                                 |
| Pxdn        | ENSRNOT000000060139 | peroxidasin homolog (Drosophila)                          |
| S100a10     | NM_031114           | S100 calcium binding protein A10                          |
| Sfrp1       | ENSRNOT000000024128 | secreted frizzled-related protein 1                       |
| Slit3       | NM_031321           | slit homolog 3 (Drosophila)                               |
| Smad6       | NM_001109002        | SMAD family member 6                                      |
| Smad7       | NM_030858           | SMAD family member 7                                      |
| Smoc1       | NM_001002835        | SPARC related modular calcium binding 1                   |
| Smurf2      | NM_001107061        | SMAD specific E3 ubiquitin protein ligase 2               |
| Spon1       | NM_172067           | spondin 1, extracellular matrix protein                   |
| Tinagl1     | NM_053582           | tubulointerstitial nephritis antigen-like 1               |
| Tll1        | NM_001106081        | tolloid-like 1                                            |
| Wisp2       | NM_031590           | WNT1 inducible signaling pathway protein 2                |

**Supplemental Table 11: Cytokine and ECM-associated Genes Upregulated 1.8-2.0-fold in PTEN-Deficient SMCs**

| Gene Symbol | Gene Accession      | Gene Description                                           |
|-------------|---------------------|------------------------------------------------------------|
| Adamts6     | NM_001108544        | ADAM metallopeptidase with thrombospondin type 1 motif, 6  |
| Angptl4     | NM_199115           | angiopoietin-like 4                                        |
| Ccr1        | NM_020542           | chemokine (C-C motif) receptor 1                           |
| Col6a2      | ENSRNOT00000001695  | collagen, type VI, alpha 2                                 |
| Ctsb        | NM_022597           | cathepsin B                                                |
| Cxcl12      | NM_001033883        | chemokine (C-X-C motif) ligand 12                          |
| Efemp2      | NM_001005907        | EGF-containing fibulin-like extracellular matrix protein 2 |
| Foxo3       | NM_001106395        | forkhead box O3                                            |
| Gdf15       | NM_019216           | growth differentiation factor 15                           |
| Gnb4        | NM_001013910        | guanine nucleotide binding protein, beta polypeptide 4     |
| Hif1a       | NM_024359           | hypoxia-inducible factor 1, alpha subunit                  |
| Il17b       | ENSRNOT000000026679 | interleukin 17B                                            |
| Il34        | NM_001025766        | interleukin 34                                             |
| Il4ra       | NM_133380           | interleukin 4 receptor, alpha                              |
| Itga3       | NM_001108292        | integrin alpha 3                                           |
| Itgb5       | NM_147139           | integrin, beta 5                                           |
| Kng1        | NM_012696           | kininogen 1                                                |
| Lama2       | ENSRNOT000000014917 | laminin, alpha 2                                           |
| Lamb1       | NM_001106721        | laminin, beta 1                                            |
| Lamb3       | ENSRNOT000000008440 | laminin, beta 3                                            |
| Loxl3       | NM_001107866        | lysyl oxidase-like 3                                       |
| Pik3r1      | NM_013005           | phosphoinositide-3-kinase, regulatory subunit 1 (alpha)    |
| Slit2       | AF141386            | slit homolog 2 (Drosophila)                                |
| Tgfb1       | NM_021578           | transforming growth factor, beta 1                         |
| Tgm2        | NM_019386           | transglutaminase 2, C polypeptide                          |
| Thbs2       | ENSRNOT000000014552 | thrombospondin 2                                           |
| Tnfrsf10b   | NM_001108873        | tumor necrosis factor receptor superfamily, member 10b     |
